# Supplementary material for: Wakefulness Is Promoted during Day Time by PDFR Signalling to Dopaminergic Neurons in Drosophila melanogaster
Source: eNeuro. 2018 Aug 8;5(4):ENEURO.0129-18.2018. doi: 10.1523/ENEURO.0129-18.2018 (PMC6102377; doi:10.1523/ENEURO.0129-18.2018)
Supplement: Extended Data Figure 4-2 — One-way ANOVA with genotype as fixed factor conducted for day-time sleep of flies with OEX of pdfr in indicated drivers. F(a-1), (N-k), where a is number of factor levels, N is the total number of replicates, and k refers to total number of groups. F statistic and p level of the main effect of genotype are indicated. Specific differences between genotypes determined after post hoc Tukey’s tests and indicated as asterisks in Figure 4B. Download Figure 4-2, DOCX file. [file sup_enu-eN-NWR-0129-18-s14.docx]

**Extended Data Figure 4-2**

|  | **Over-expression of *pdfr*** | | |
| --- | --- | --- | --- |
| **Driver** | **F-statistic** | | ***p*** |
| ***TH-A* *GAL4*** | F2,93 | = 2.9 | 0.06 |
| ***TH-C1 GAL4*** | F2,93 | = 0.21 | 0.8 |
| ***TH-C' GAL4*** | F2,93 | = 0.46 | 0.63 |
| ***TH-D1 GAL4*** | F2,91 | = 12.21 | < 0.0005 |
| ***TH-D' GAL4*** | F2,93 | = 18.76 | < 0.00001 |
| ***TH-D4 GAL4*** | F2,93 | = 9.99 | < 0.0005 |
| ***TH-F2 GAL4*** | F2,91 | = 2.37 | 0.1 |
| ***TH-F3 GAL4*** | F2,76 | = 13.36 | < 0.0005 |
| ***TH-G1 GAL4*** | F2,90 | = 4.06 | < 0.05 |
